# Supplementary material for: Inflammatory cutaneous lesions and pulmonary manifestations in a new patient with autosomal recessive ISG15 deficiency case report
Source: Springer Nature journal article supplement (doi:10.1186/s13223-020-00473-7), 2020-09-03
Supplement: MOESM1 [file 18345814]

| <b>DISEASE</b>                                                                                                                                                                       | <b>GENE</b>                 |
|--------------------------------------------------------------------------------------------------------------------------------------------------------------------------------------|-----------------------------|
| Spondyloenchondrodysplasia with immune dysregulation                                                                                                                                 | <b>ACP5</b>                 |
| Inflammatory skin and bowel disease, neonatal, 1                                                                                                                                     | <b>ADAM17</b>               |
| Dyschromatosis symmetrica hereditaria AND Aicardi-Goutieres syndrome 6                                                                                                               | <b>ADAR</b>                 |
| Vibratory urticaria                                                                                                                                                                  | <b>ADGRE2</b>               |
| New Autoinflammatory Phenotype                                                                                                                                                       | <b>AGBL3</b>                |
| Singleton-Merten syndrome 2                                                                                                                                                          | <b>DDX58</b>                |
| Type I interferon-mediated autoinflammation due to DNase II deficiency                                                                                                               | <b>DNASE2</b>               |
| Singleton-Merten syndrome 1 AND Aicardi-Goutieres syndrome 7                                                                                                                         | <b>IFIH1</b>                |
| Familial Mediterranean fever                                                                                                                                                         | <b>MEFV</b>                 |
| Hyper-IgD Syndrome/ Mevalonic aciduria/ Porokeratosis 3, multiple types                                                                                                              | <b>MVK</b>                  |
| Tumor Necrosis Factor receptor-associated periodic syndrome                                                                                                                          | <b>TNFRSF1A, TNFRSF11A</b>  |
| CINCA syndrome, Familial cold inflammatory syndrome 1, Keratoendothelitis fugax hereditaria, Muckle-Wells syndrome AND Deafness, autosomal dominant 34, with or without inflammation | <b>NLRP3 (CIAS1, NALP3)</b> |
| Familial cold autoinflammatory syndrome 2                                                                                                                                            | <b>NLRP12 (NALP12)</b>      |
| Hydatidiform mole, recurrent, 1                                                                                                                                                      | <b>NLRP7</b>                |
| Blau Syndrome                                                                                                                                                                        | <b>NOD2 (CARD15)</b>        |
| Pyogenic sterile arthritis, pyoderma gangrenosum, and acne                                                                                                                           | <b>PSTPIP1</b>              |
| Majeed Syndrome                                                                                                                                                                      | <b>LPIN2</b>                |

|                                                                                                                                                                       |                                          |
|-----------------------------------------------------------------------------------------------------------------------------------------------------------------------|------------------------------------------|
| Interleukin 1 receptor antagonist deficiency                                                                                                                          | <b>IL1RN</b>                             |
| Psoriasis 14, pustular                                                                                                                                                | <b>IL36RN</b>                            |
| Proteasome-associated autoinflammatory syndromes                                                                                                                      | <b>PSMG2, PSMA3, PSMB4, PSMB8, PSMB9</b> |
| Cherubism                                                                                                                                                             | <b>SH3BP2</b>                            |
| H Syndrome                                                                                                                                                            | <b>SLC29A3</b>                           |
| STING-associated vasculopathy, infantile-onset (SAVI)                                                                                                                 | <b>TMEM173</b>                           |
| Autoinflammatory syndrome, familial, Behcet-like                                                                                                                      | <b>TNFAIP3</b>                           |
| Polyglucosan body myopathy 1 with or without immunodeficiency                                                                                                         | <b>RBCK1</b>                             |
| Autoinflammation, panniculitis, and dermatosis syndrome                                                                                                               | <b>OTULIN</b>                            |
| Autoinflammation with infantile enterocolitis AND Familial cold autoinflammatory syndrome 4                                                                           | <b>NLRC4</b>                             |
| Autoinflammation, antibody deficiency, and immune dysregulation syndrome AND Familial cold autoinflammatory syndrome 3                                                | <b>PLCG2</b>                             |
| Susceptibility to Psoriasis 15, pustular                                                                                                                              | <b>AP1S3</b>                             |
| Pityriasis rubra pilaris AND Psoriasis 2                                                                                                                              | <b>CARD14</b>                            |
| ADA2 Deficiency                                                                                                                                                       | <b>CECR1</b>                             |
| IL10/R/RB Deficiency                                                                                                                                                  | <b>IL10, IL10RA, IL10RB</b>              |
| Autoinflammation with arthritis and dyskeratosis; Palmoplantar carcinoma, multiple self-healing AND Susceptibility to Vitiligo-associated multiple autoimmune disease | <b>NLRP1</b>                             |
| Proteasome-associated autoinflammatory syndrome 2 AND Keratosis linearis with ichthyosis congenita and sclerosing keratoderma                                         | <b>POMP</b>                              |
| Autoimmune interstitial lung, joint, and kidney disease                                                                                                               | <b>COPA</b>                              |
| Chilblain lupus, Aicardi-Goutieres syndrome 1, dominant and recessive AND Vasculopathy, retinal, with cerebral leukodystrophy                                         | <b>TREX1</b>                             |
| Chilblain lupus 2 AND Aicardi-Goutieres syndrome 5                                                                                                                    | <b>SAMHD1</b>                            |
| Aicardi-Goutieres syndrome 4                                                                                                                                          | <b>RNASEH2A</b>                          |
| Aicardi-Goutieres syndrome 2                                                                                                                                          | <b>RNASEH2B</b>                          |

|                                                                                                          |                      |
|----------------------------------------------------------------------------------------------------------|----------------------|
| Aicardi-Goutieres syndrome 3                                                                             | <b>RNASEH2C</b>      |
| Retinitis pigmentosa and erythrocytic microcytosis                                                       | <b>TRNT1</b>         |
| Van Esch-O'Driscoll syndrome AND Pigmentary disorder, reticulate, with systemic manifestations, X-linked | <b>POLA1</b>         |
| Pseudo-TORCH syndrome 2                                                                                  | <b>USP18</b>         |
| Autoinflammatory periodic fever, immunodeficiency, and thrombocytopenia (PFIT)                           | <b>WDR1</b>          |
| Autoinflammation associated with LUBAC deficiency                                                        | <b>SHARPIN/RNF31</b> |
| Amyloidosis, primary localized cutaneous, 1                                                              | <b>OSMR</b>          |
| Multiplex Family with $\gamma$ -Secretase Spectrum of Autoinflammatory Skin Phenotypes                   | <b>NCSTN</b>         |
