# Supplementary material for: Inflammatory cutaneous lesions and pulmonary manifestations in a new patient with autosomal recessive ISG15 deficiency case report
Source: Springer Nature journal article supplement (doi:10.1186/s13223-020-00473-7), 2020-09-03
Supplement: MOESM2 [file 18345814]

| Country of origin | Patients       | Mendelian susceptibility to mycobacterial diseases (MSMD) | Viral Infection            | Idiopathic basal ganglia calcification (IBGC) | Other features          | Reported variants                                                                                               |
|-------------------|----------------|-----------------------------------------------------------|----------------------------|-----------------------------------------------|-------------------------|-----------------------------------------------------------------------------------------------------------------|
| China             | PI female      | No vaccination                                            | No severe viral infections | X                                             | Seizures                | Homozygous nonsense exon 2 variant<br>p.Gln55X                                                                  |
|                   | P II female    |                                                           |                            | X                                             |                         |                                                                                                                 |
|                   | P III female   |                                                           |                            | X                                             |                         |                                                                                                                 |
| Turkey            | Female Patient | BCGitis                                                   |                            | X                                             | Along the cerebral falx | Homozygous nonsense exon 2 variant<br>p.Glu127X                                                                 |
| Iran              | PI male        |                                                           |                            | X                                             |                         | Homozygous frameshift exon 2 variant<br>p.Leu114fs                                                              |
|                   | P II male      |                                                           |                            |                                               |                         |                                                                                                                 |
| Argentina         | Female Patient | No BCGitis after BCG vaccination at birth                 |                            |                                               | X                       | Respiratory manifestations like recurrent wheezing and lobar pneumonias (seven isolated and unrelated episodes) |
