# Supplementary material for: Inflammatory cutaneous lesions and pulmonary manifestations in a new patient with autosomal recessive ISG15 deficiency case report
Source: Springer Nature journal article supplement (doi:10.1186/s13223-020-00473-7), 2020-09-03
Supplement: MOESM3 [file 18345814]

|                                              | <b>1 year and<br/>2 months</b>                                                                                                                                                                              | <b>3 years and<br/>6 months</b>            | <b>4 years and<br/>8 months</b>             |
|----------------------------------------------|-------------------------------------------------------------------------------------------------------------------------------------------------------------------------------------------------------------|--------------------------------------------|---------------------------------------------|
| <b>Total<br/>Lymphocytes</b>                 | 7114/mm <sup>3</sup>                                                                                                                                                                                        | 3746/mm <sup>3</sup>                       | 2457/mm <sup>3</sup>                        |
| <b>CD3 *</b>                                 | 58%<br>4126/mm <sup>3</sup><br>(3430-4147)                                                                                                                                                                  | 52%<br>1948/mm <sup>3</sup><br>(2054-3169) | 58%<br>1425/mm <sup>3</sup><br>(2054-3169)  |
| <b>CD4 *</b>                                 | 29%<br>2063/mm <sup>3</sup><br>(1718-2550)                                                                                                                                                                  | 26%<br>973/mm <sup>3</sup><br>(1129-1581)  | 28.7%<br>705/mm <sup>3</sup><br>(1129-1581) |
| <b>CD8 *</b>                                 | 27%<br>1920/mm <sup>3</sup><br>(882-1534)                                                                                                                                                                   | 25%<br>936/mm <sup>3</sup><br>(711-1121)   | 27.5%<br>675/mm <sup>3</sup><br>(711-1121)  |
| <b>CD3/DR *</b>                              | 10%                                                                                                                                                                                                         | 5%                                         | 8%                                          |
| <b>CD16/56 *</b>                             | 10.7%<br>761/mm <sup>3</sup><br>(245-503)                                                                                                                                                                   | 5%<br>187/mm <sup>3</sup><br>(246-451)     | 6.2%<br>152/mm <sup>3</sup><br>(246-451)    |
| <b>CD19 *</b>                                | 30%<br>2134/mm <sup>3</sup><br>(756-1260)                                                                                                                                                                   | 41%<br>1535/mm <sup>3</sup><br>(411-658)   | 34%<br>835/mm <sup>3</sup><br>(411-658)     |
| <b>IgG +</b>                                 | 747 mg/dl<br>(762 +/- 209)                                                                                                                                                                                  | 1240 mg/dl<br>(929 +/- 228)                | 1050 mg/dl<br>(929 +/- 228)                 |
| <b>IgA +</b>                                 | 44 mg/dl<br>(50 +/- 24)                                                                                                                                                                                     | 50 mg/dl<br>(93 +/- 27)                    | 75 mg/dl<br>(93 +/- 27)                     |
| <b>IgM +</b>                                 | 65 mg/dl<br>(58 +/- 23)                                                                                                                                                                                     | 49 mg/dl<br>(56 +/- 18)                    | 65 mg/dl<br>(56 +/- 18)                     |
| <b>Antibody<br/>response to<br/>vaccines</b> | Anti-measles IgG positive<br>Anti-rubella IgG positive<br>Anti-HBsAg IgG positive<br>Anti-HAV IgG negative<br>Anti-VZV IgG negative<br>Anti-tetanus toxoid IgG: 0.5 UI/ml<br>Anti-pneumococcal IgG: 25 mg/l |                                            |                                             |
